# Supplementary material
Source: publisher figshare collection journal article supplement (https://acs.figshare.com/ndownloader/files/25916012)
Supplement: Supplementary file 1 [file 25916012]

**Supporting information**

**The Interplay between Phase Separation and  
Gelation Controlling the Morphologies of the  
Reactive Covalent Network/Polymer Blends**

Wangsuk Oh, Jae-Sung Bae, Ji-Woong Park\*

School of Materials Science and Engineering, Gwangju Institute of Science and Technology,  
123 Cheomdangwagi-ro, Buk-gu, Gwangju 61005, Korea.

E-mail address : [jiwoong@gist.ac.kr](mailto:jiwoong@gist.ac.kr)

## **Table of contents**

**S1. Experimental procedure**

**S2. FTIR spectroscopy of pristine polymer/UN blend and solvent-treated blends**

**S3. DLS characterization of polymer/UN sol mixture**

**S4. Morphology characterization of polymer/UN blends and e-polymer/UNs**

**S5. Effect of polymer molecular weight on the morphology of polymer/UNs**

**S6. Estimation of Hansen solubility parameter of UN sol**

**S7. Calculation of interaction parameters between polymers and UN sol**

**S8. Effect of polymerization time on the morphology of e-polymer/UN films**

**S9. Effect of solvent evaporation temperature on the morphology of e-polymer/UN films**

**S10. Supplementary references**

## **S1. Experimental procedure**

### **1. Materials and methods**

Tetrakis(4-aminophenyl)methane (TAPM) was synthesized as previously reported method with modification.<sup>1</sup> Hexamethylene diisocyanate (HDI) (99%, Sigma Aldrich) was freshly distilled under reduced pressure. Anhydrous grade solvents of N,N-dimethylformamide(DMF) (99.8%), N,N-dimethylacetamide(DMAc) (99.8%), Dimethyl sulfoxide(DMSO) (99.9%), propylene carbonate, and acetic acid (99.8%) were purchased from Sigma Aldrich. Tetrahydrofuran (THF)(99.9%), chloroform, acetone, acetonitrile, dichloromethane, chlorobenzene, pyridine, methanol, ethanol, water, and n-hexane were purchased from commercial sources, and used without further purification. All polymers used in this study were purchased from Sigma Aldrich and Polymer Source. Inc.. The weight average molecular weight ( $M_w$ ) and number average molecular weight ( $M_n$ ) of the polymers were obtained by Gel permeation chromatography (GPC). Poly(methyl methacrylate) (PMMA) of three different molecular weights (PMMA15000:  $M_w$ =14,800 Da,  $M_n$ =9,000 Da; PMMA2700:  $M_w$ =2,700 Da,  $M_n$ =2,500 Da; PMMA50000:  $M_w$ =54,500 Da,  $M_n$ =50,000 Da), polysulfone (PSF) (PSF35000:  $M_w$ =40,700 Da,  $M_n$ =24,300 Da), polyethylene glycol (PEG) (PEG35000:  $M_w$ =31,100 Da,  $M_n$ =27,100 Da; PEG10000:  $M_w$ =10,400 Da,  $M_n$ =8,800 Da; PEG2050:  $M_w$ =2,060 Da,  $M_n$ =2,000 Da), polystyrene (PS) (PS5400:  $M_w$ =5,400 Da,  $M_n$ =4,700 Da; PS35000:  $M_w$ =35,000 Da), and polyvinyl pyrrolidone (PVP) (PVP29000:  $M_w$ =28,600 Da,  $M_n$ =11,700 Da; PVP10000:  $M_w$ =9,900 Da,  $M_n$ =4,700 Da) were used after drying at least for 24 hours in a desiccator prior to use.

#### **2-1. Preparation of urea-bonded network (UN) sols**

To prepare a 0.04 g/mL UN sol, tetrakis(4-aminophenyl) methane (TAPM) (0.200 g, 0.526 mmol) was dissolved in 5 mL of anhydrous DMF under a nitrogen atmosphere at room temperature. The solution was added to a solution of distilled hexamethylene diisocyanate (HDI) (0.175 g, 1.052 mmol) in DMF (4.4 mL) at room temperature. The reaction mixture remained in the liquid sol state until the gelation time ( $t_g$ ), which was about 85 hours for a concentration of 0.04 g/mL.

#### **2-2. Typical procedure for preparation of polymer/UN blends**

In a typical UN sol preparation for blending with polymer, UN monomer solution mixture was kept for 60 hours at room temperature. To the UN sol prepared from the above was added specific amount of polymer. The weight fraction of the polymer relative to UN sol was varied in the range of  $W_p$ =0.1~0.8. The polymer/UN sol mixture was heated at 50 °C and stirred for 90 minutes. The solution was cooled to room temperature for 30 minutes under stirring after removing the heating bath. The resulting polymer/UN sol solution was cast onto a glass plate, and the solvent was evaporated by heating sequentially at the designated temperatures under nitrogen flow. The temperature increasing rate was 1°C /min. After solvent evaporation, the glass plate with the film was immersed in water to obtain free-standing polymer/UN blend film.

#### **2-3. Preparation of PMMA/UN blend and the nanostructured PMMA/UN film**

PMMA/UN blend films were prepared following the typical polymer/UN blend synthesis procedures. Heating sequence for solvent evaporation was (1) 50°C for 1 h, (2) 80°C for 8 h. After solvent evaporation, the glass plate with the film was immersed in water for 12 hours to obtain free-standing PMMA/UN blend film. PMMA was removed from the composite by stirring in acetic acid for 1 h, in water for 12 h, and in acetone for 24 h at room temperature. The film was dried in vacuum oven at 80°C for 24 h.

#### **2-4. Preparation of PSF/UN blend and freestanding nanoporous UN film**

PSF/UN blends were prepared following the typical polymer/UN blend synthesis procedures. The heating sequence for solvent evaporation was (1) 50 °C for 1 h, (2) 80°C for 8 h. After solvent evaporation, the glass plate with the film was immersed in water for 12 hours to obtain free-standing PSF/UN blend film. PSF was removed from the composite by stirring in THF for 1 week at room temperature. The film was dried in vacuum oven at 80°C for 24 h.

#### **2-5. Preparation of PS/UN blend film and solvent treatment.**

PS/UN composite films were prepared following the typical polymer/UN blend synthesis procedures. Heating sequence for solvent evaporation was (1) 50°C for 1 h, (2) 80°C for 8 h. After solvent evaporation, the glass plate with the film was immersed in water to obtain free-standing PS/UN composite film. PS was removed from the composite by stirring in THF for 1 week at room temperature. The film was dried in vacuum oven at 80°C for 24 h.

#### **2-6. Sample preparation for investigation of polymer/UN morphologies with different polymerization time ( $t_p$ )**

e-polymer/UN films were prepared following the typical procedures for each polymers, while the polymerization time was varied to 1h, 6h, 24h. The weight fraction of PS/UN and PMMA/UN was kept as 50wt%. PEG/UN blends were prepared with 60wt% polymer weight fraction following the heating sequence (1) 30°C for 2h, (2) 50°C for 2h, and (3) 60°C for 5h. Then PEG was removed from the blend by stirring in water for 1 week at room temperature. The film was dried in vacuum oven at 80°C for 24 h.

#### **2-7. Preparation of polymer/UN sol mixture for Dynamic Light Scattering(DLS) analysis**

To a 0.04 g/ml UN sol prepared by a typical procedure, each polymers were added with various weight fractions. The polymer/UN sol mixture solution was heated at 50 °C and stirred for 90 minutes. The solution was cooled to room temperature for 30 minutes under stirring, and immediately transferred to cuvette for DLS measurement.

#### **2-8. Hansen solubility parameter estimation of UN sol**

To 2 ml of various organic solvents and water, a 0.7 ml of 0.04g/ml UN sol was added dropwise and gently stirred for about 30 seconds. The solvents were classified into sol-solvent and non-solvent depending on the phase of the solvent/UN sol mixture. Based on the Hansen solubility parameter values of each solvent, optimization was performed by MATLAB<sup>®</sup> following the procedure reported in the literature.<sup>2</sup> (The detailed procedure is given in the following section)

## **2-9. Preparation of nanostructured PMMA/UN film with different solvent evaporation temperatures.**

PMMA/UN blend films ( $W_p = 0.5$ ) were prepared following a typical procedure, while the solvent temperature was each varied to 30°C or 70°C. After solvent evaporation, the PMMA/UN blend film was immersed in water for 12 hours. PMMA was removed from the blend by stirring in acetic acid for 1 h, in water for 12 h, and in acetone for 24 h at room temperature. The film was dried in vacuum oven at 80°C for 24 h.

## **2-10. Measurement of gelation concentration of polymer/UN sol mixtures**

Each of the PEG/UN or PMMA/UN sol mixtures ( $W_p = 0, 0.2, 0.4, 0.6$ ) was cast in a Petri dish (diameter = 5 cm). The volume of each sample was 5 mL. The weight of the dish and the sample was recorded. Then the samples were dried at 30°C under nitrogen atmosphere. Gelation point was defined as the point at which the solution did not flow even when the dish was tilted about 30 degrees from the table top surface. The weight of gelled sample on the dish was recorded. The weight loss corresponds to the amount of evaporated solvent. The composition of the resulting gelled mixture was calculated while considering the initial composition and the weight loss by drying.

## **3. Characterization**

Scanning electron microscopy (SEM) was performed on a JEOL JSM-7500F Field emission scanning electron microscope. Sample films for cross-section analysis were fractured in liquid nitrogen and dried for 12 h under vacuum. The samples were then coated with 3nm of platinum using sputter before SEM imaging. Dynamic Light Scattering (DLS) was carried out using a model ELS-Z of Zeta-potential & Particle analyzer (OTSUKA Electronics Co., Ltd). Each sample was analyzed three times, and then the average value was calculated. The Fourier Transform Infrared (FTIR) spectra (4,000–400  $\text{cm}^{-1}$ ) were recorded by a System 2000 FTIR spectrophotometer (Perkin Elmer). FTIR samples of polymers were prepared by the KBr pellet method, and freestanding films of polymer/UN blends were used for measurements. Reflection polarized light microscopy was conducted with BX51-P polarizing microscope (Olympus corporation).

The molecular weights ( $M_n$  and  $M_w$ ) of PMMA was obtained from Gel Permeation Chromatography (GPC) by using EcoSEC HLC-8320 GPC (Tosoh) equipped with a refractive index detector. Three columns were used (two TSKgel SupermultiporeHZ-M columns [4.6×150 mm] and a TSKgel SuperHZ-2500 [4.6×150 mm]), which is connected with a Shodex HK-G guard filter. Tetrahydrofuran (THF) was used as an eluent with a flow rate of 0.35  $\text{mLmin}^{-1}$  at 40 °C. Calibration curve was obtained using monodisperse PMMA as a standard. The molecular weights of PEGs were obtained with the three columns (two TSKgel GMPWxl, and TSKgel G2500PWxl [7.8 x 300mm]) and a Tskgel guard PWxl guard column. 0.1M  $\text{NaNO}_3$  aqueous solution was used as an eluent with a flow rate of 1.0  $\text{mLmin}^{-1}$  at 40 °C. Calibration curve was obtained using monodisperse PEG as a standard. For GPC analysis of PSF, PS, and PVP, we used home-made GPC system equipped with three columns (two Shodex LF-804 columns and a Shodex LF-G guard column). We analyzed PSF and PS with the elution conditions (flow rate=1.0 $\text{mLmin}^{-1}$  at 40 °C, eluent=THF), and PVP with a flow rate=1.0 $\text{mLmin}^{-1}$  at 50 °C, eluent=DMF(10mM LiBr). Calibration curve was obtained using monodisperse PS as a standard for THF, and PEG for DMF eluent.

## S2. FTIR spectroscopy of PS/UN blends and solvent-treated films

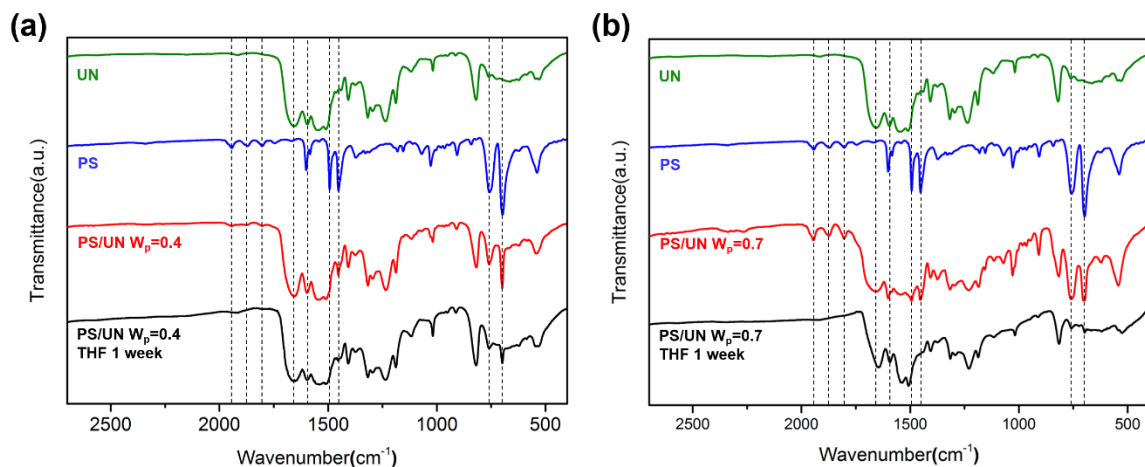

**Figure S1.** FTIR spectrum of PS/UN before and after solvent treatment. (a)  $W_p = 0.4$ , (b)  $W_p = 0.7$ .

**Table S1.** FTIR peak assignments of polymer/UN blends

| Polymer/UN             | Peak (cm <sup>-1</sup> ) | Vibrational modes                                         |
|------------------------|--------------------------|-----------------------------------------------------------|
| PSF/UN <sup>3</sup>    | 3450-3300                | Secondary N-H stretching                                  |
|                        | 3080-3030                | Aromatic C-H stretching                                   |
|                        | 1375, 1151               | S=O asymmetric and symmetric stretching                   |
|                        | 1244, 1014               | C-O asymmetric stretching                                 |
| PS/UN                  | 3450-3300                | Secondary N-H stretching                                  |
|                        | 3080-3030                | Aromatic C-H stretching                                   |
|                        | 2000-1650                | Combination vibration, overtones of aromatic hydrocarbons |
|                        | 1645                     | CO stretching                                             |
|                        | 1600-1585                | C-C stretching (in-ring)                                  |
|                        | 1500-1400                | C-C stretching (in-ring)                                  |
| PEG/UN <sup>4,5</sup>  | 900-675                  | C-H out of plane vibration                                |
|                        | 3450-3300                | Secondary N-H stretching                                  |
|                        | 1408                     | Aromatic C=C stretching                                   |
|                        | 1348                     | O-H bending                                               |
|                        | 1168-1049                | C-O-C stretching                                          |
| PMMA/UN <sup>6-8</sup> | 1040                     | O-H stretching                                            |
|                        | 3450-3300                | Secondary N-H stretching                                  |
|                        | 3080-3030                | Aromatic C-H stretching                                   |
|                        | 2952                     | O-CH <sub>3</sub> stretching of PMMA                      |
|                        | 3000-2850                | Aliphatic C-H stretching                                  |
|                        | 1727-1732                | C=O stretching (Ketone)                                   |
|                        | 1450                     | C-H bending (Alkane)                                      |
|                        | 1149                     | C-O-C stretching (Ether)                                  |
|                        | 1018                     | C-N stretching                                            |
|                        | 751-988                  | (CH <sub>2</sub> ) <sub>n</sub> with $n \geq 4$ (Alkane)  |

### S3. DLS characterization of polymer/UN sol mixture

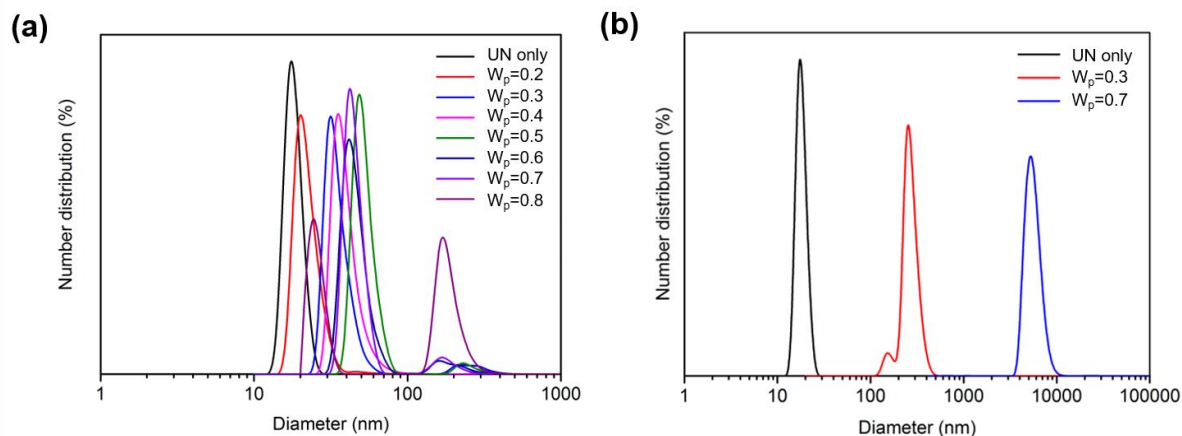

**Figure S2.** Particle size distribution of polymer/UN sol mixture solution obtained from dynamic light scattering (DLS) analysis. (a) PMMA/UN and (b) PS/UN.

**Table S2.** Estimated polymer overlap concentration of the polymers studied in this work

| Polymer | average $M_w$<br>(g/mol) | polymer overlap concentration,<br>$C^*$ (g/ml) <sup>[a]</sup> | $W_p$ at $C^*$ | reference |
|---------|--------------------------|---------------------------------------------------------------|----------------|-----------|
| PEG     | 31,100                   | 0.0369                                                        | 0.470          | 10        |
| PMMA    | 14,800                   | 0.0966                                                        | 0.707          | 11        |
| PSF     | 40,700                   | 0.0325                                                        | 0.448          | 12        |
| PS      | 35,000                   | 0.0987                                                        | 0.712          | 13        |

[a] The polymer overlap concentration of each polymers was calculated from the data provided in the above references.

#### S4. Morphology characterization of polymer/UN blends and e-polymer/UNs

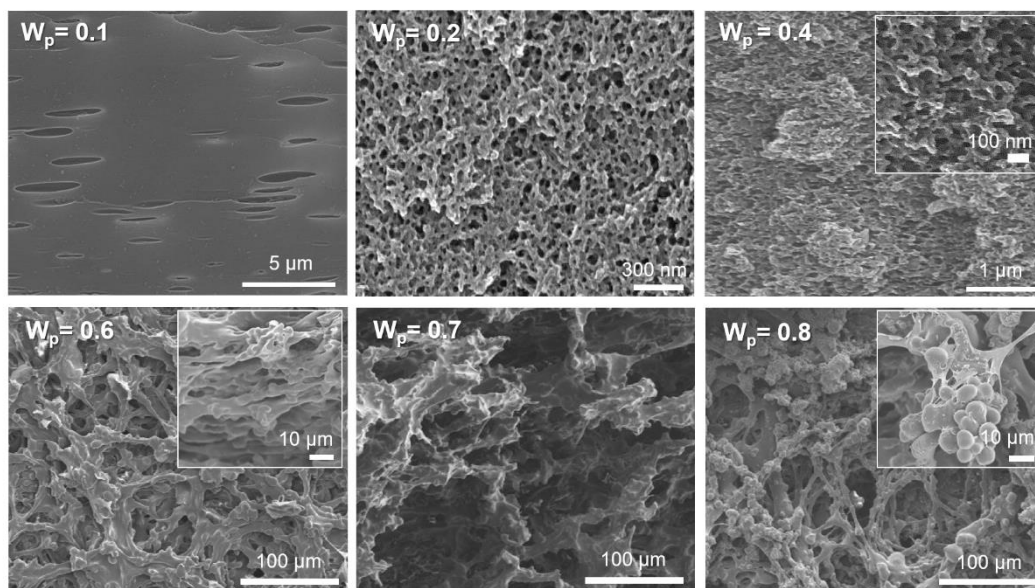

**Figure S3.** Cross-sectional SEM images of e-PSF/UN ( $W_p=0.1\sim0.8$ ) obtained after treatment of PSF/UN blend in THF. The blend film was dipped in THF under stirring for 1 week, and dried in vacuum at 80°C for 24 h.

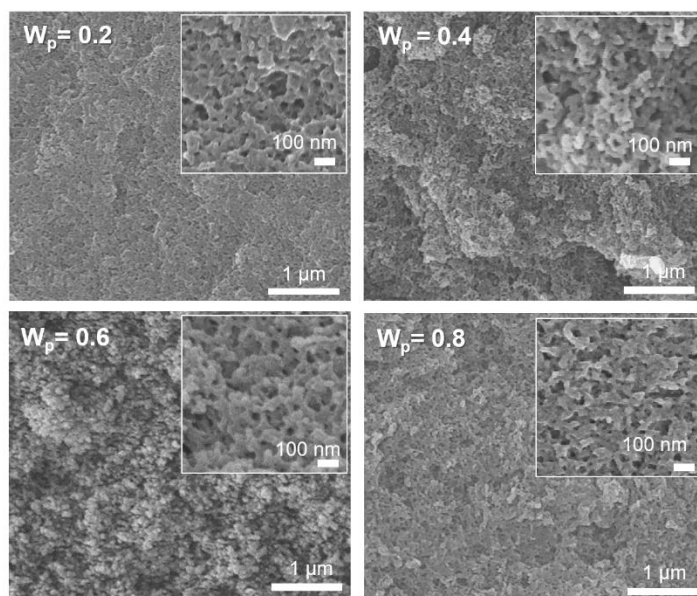

**Figure S4.** Cross-sectional SEM images of e-PEG/UN ( $W_p=0.2\sim0.8$ ) obtained after treatment of PEG/UN blend in deionized water. The blend film was dipped in deionized water under stirring for 1 week, and dried in vacuum at 80°C for 24 h.

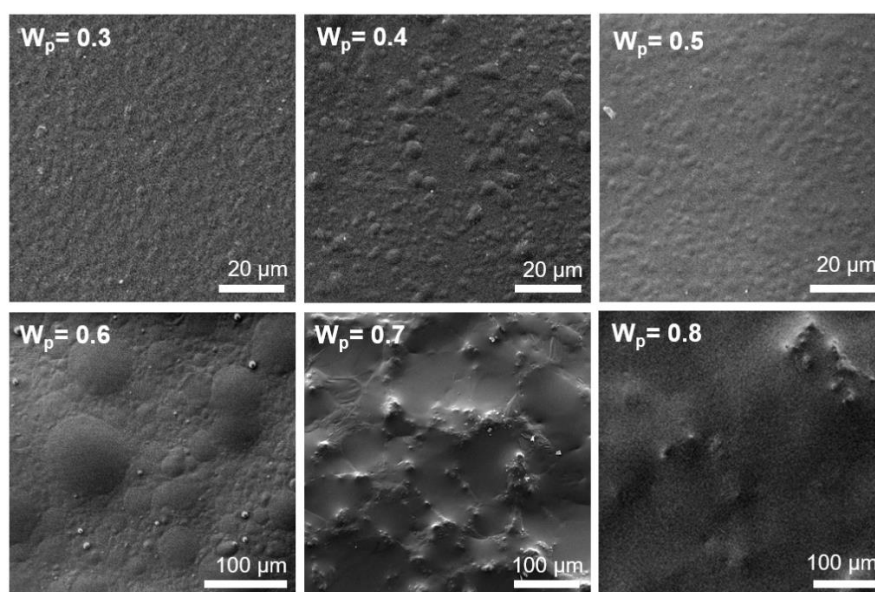

**Figure S5.** Top surface SEM images of PS/UN blend films with various PS compositions ( $W_p=0.3\sim0.8$ )

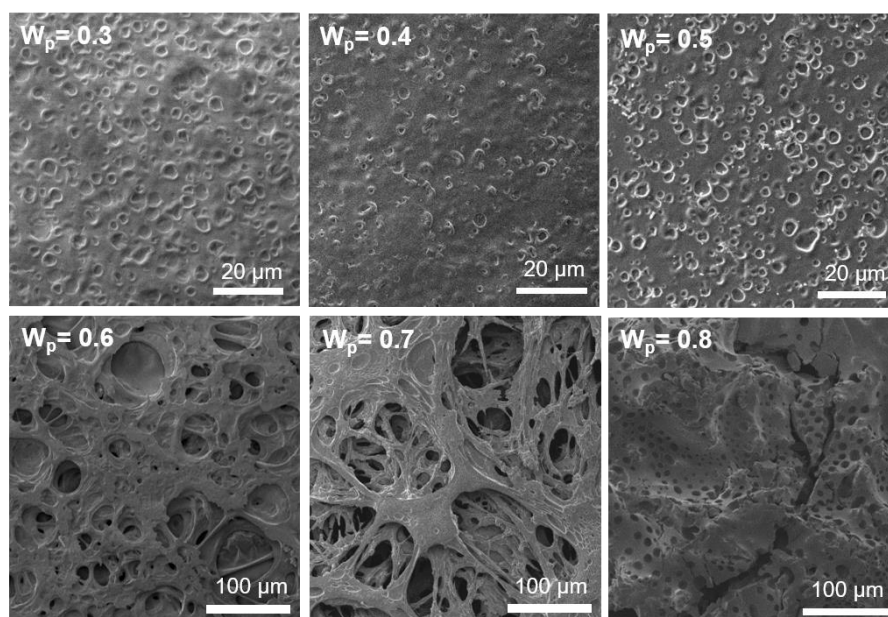

**Figure S6.** Top surface SEM images of PS/UN blends ( $W_p=0.3\sim0.8$ ) after THF treatment(e-PS/UN). PS/UN blend films were dipped in THF under stirring for 1 week, and dried in vacuum at 80°C for 24 hours.

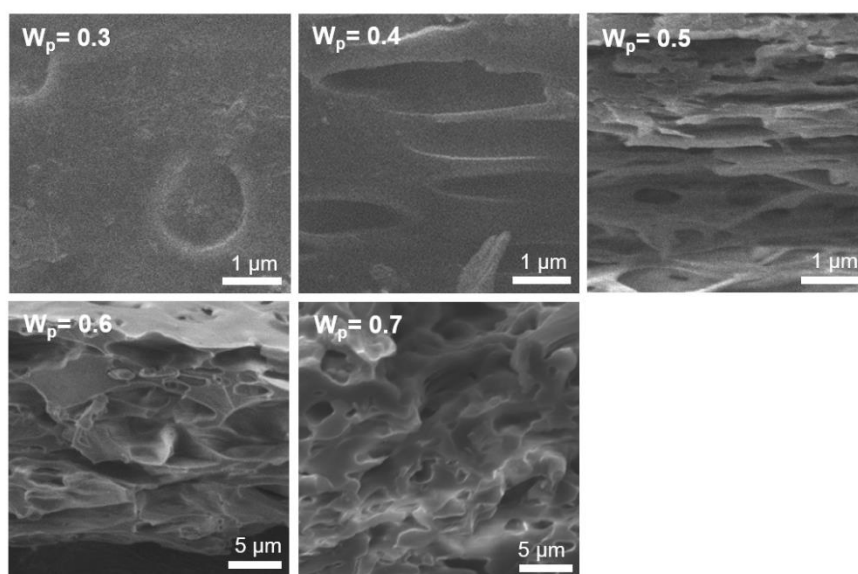

**Figure S7.** Cross-sectional SEM images of e-PS/UN ( $W_p=0.3\sim0.7$ ) obtained after treatment of PS/UN blend in THF. The blend film was dipped in THF under stirring for 1 week, and dried in vacuum at 80°C for 24 h.

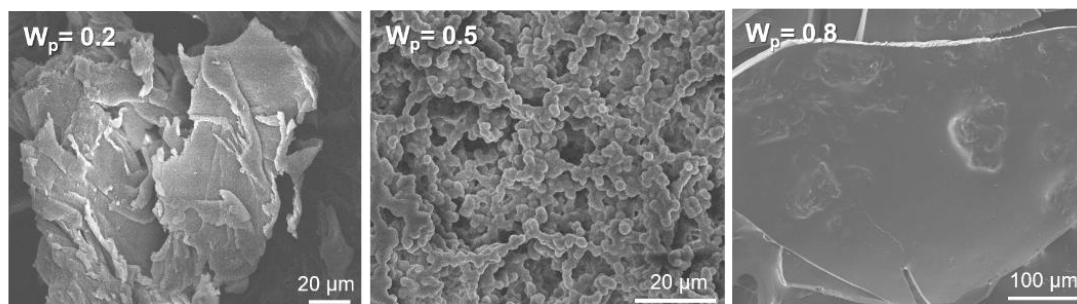

**Figure S8.** SEM images of e-PVP/UN ( $W_p=0.2, 0.5, \text{ and } 0.8$ ) derived from PVP/UN. The membranes were prepared by immersing PVP/UN blend film or powder in deionized water for 1 week and then dried in a vacuum oven at 100 °C for 12 h.

## S5. Effect of polymer molecular weight on the morphology of polymer/UNs

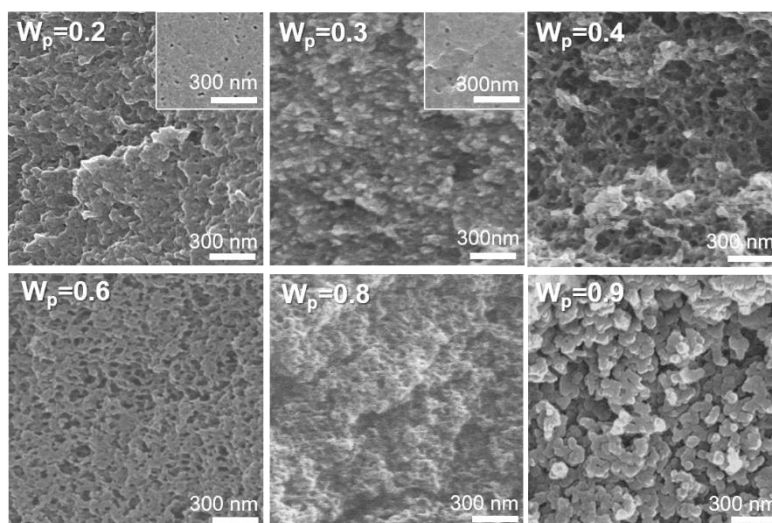

**Figure S9.** Cross-sectional SEM images of e-PEG/UN samples obtained after solvent treatment of PEG/UN blends (PEG10000,  $W_p=0.2\sim0.9$ ). The blend film was dipped in deionized water under stirring for 1 week, and dried in vacuum at 80°C for 24 h.

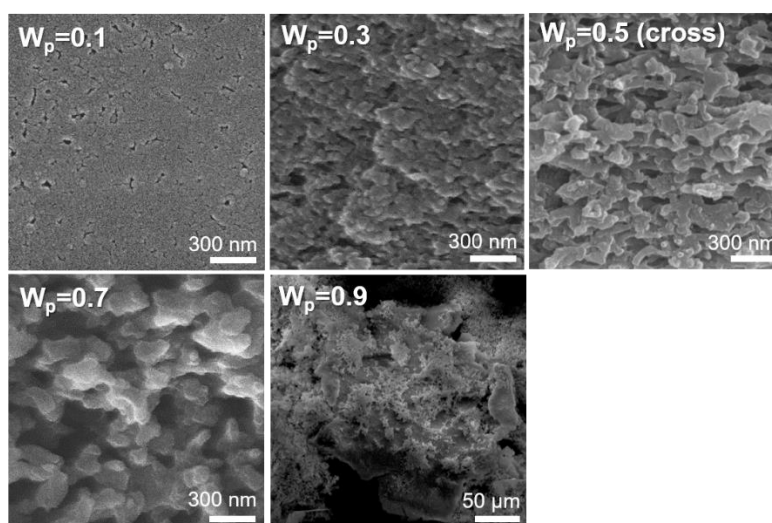

**Figure S10.** Cross-sectional SEM images of e-PMMA/UN obtained after solvent treatment of PMMA/UN blends (PMMA2700,  $W_p=0.1\sim0.9$ ). The blend film was dipped consecutively in acetic acid, deionized water, and acetone, then dried in vacuum at 80°C for 24 h.

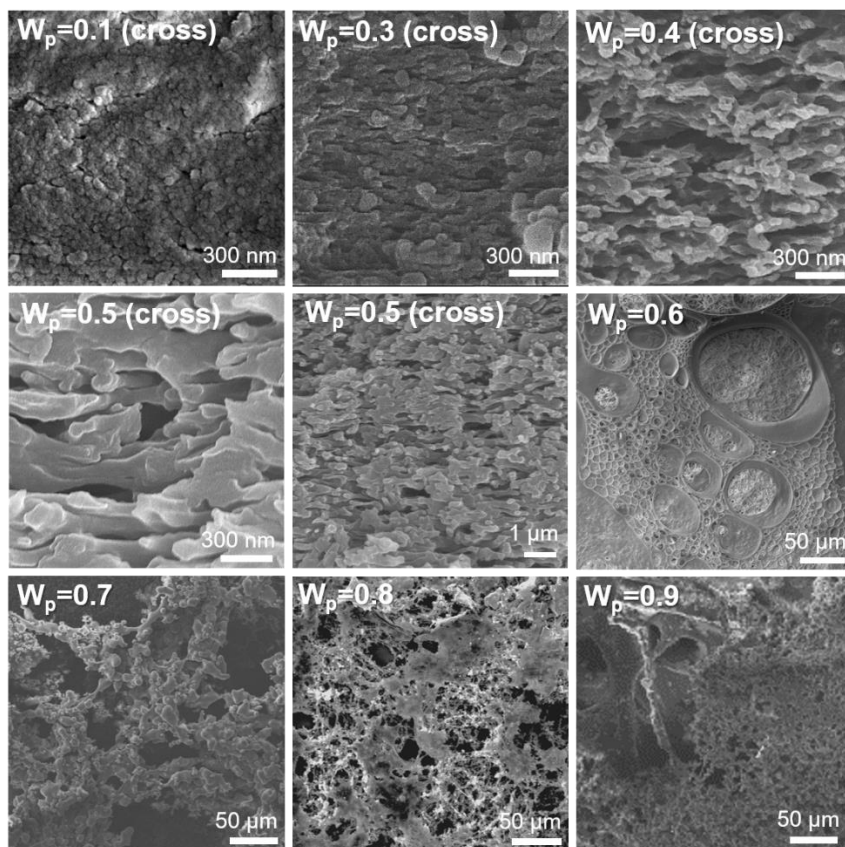

**Figure S11.** Cross-sectional SEM images of e-PMMA/UN obtained after solvent treatment of PMMA/UN blends (PMMA50000,  $W_p=0.1\sim0.9$ ). The blend film was dipped consecutively in acetic acid, deionized water, and acetone, then dried in vacuum at 80°C for 24 h.

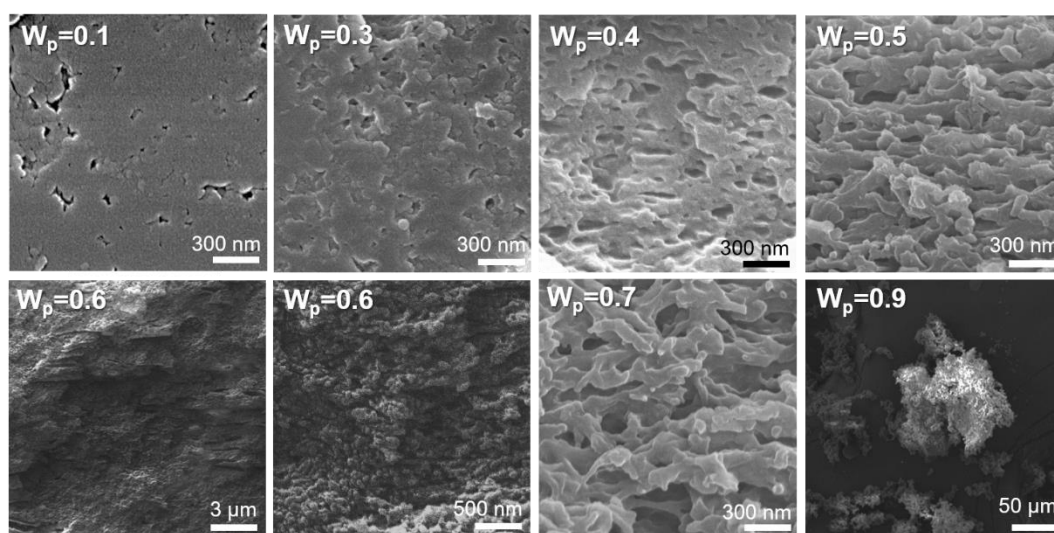

**Figure S12.** Cross-sectional SEM images of e-PS/UN samples obtained after solvent treatment of PS/UN blends (PS4700,  $W_p=0.1\sim0.9$ ). The blend film was dipped in THF under stirring for 1 week, and dried in vacuum at 80°C for 24 h.

## S6. Estimation of Hansen solubility parameter of UN sol

The estimation of HSP values of UN sol includes the following 3 steps.

- 1) 3-D plotting of the solvents using HSP values as coordinates,
- 2) searching a sphere whose origin is HSP values of UN sol and that embraces sol-solvents inside but excludes non-solvents,
- 3) optimization of the sphere's position and size by comparing its goodness-of-fit.

1) The solvents were classified into two categories (sol-solvent or non-solvent) based on the result of UN sol addition test (**Table S3 and Figure S11**). Using the HSP values of the solvents as coordinates ( $2\delta_d$ ,  $\delta_p$ ,  $\delta_h$ ), we plotted the dots in 3-D space, which is often called Hansen space.

2) We can think of a sphere whose origin is HSP values of UN sol. According to the characteristics of HSP values, the sphere should encompass sol-solvents (good solvents) inside but excludes non-solvents (poor solvents). The size or radius of the sphere, and its location (determined by its origin, HSP values of UN sol) are the two variables to be optimized. We used a MATLAB program to find the optimal location and size of the sphere that satisfied the above criterion. The algorithm and fitting procedure was based on the reference,<sup>2</sup> and the MATLAB code was written and modified for our calculation.

3) For optimization of the two variables, we first make an initial guess for the location and the radius based on the HSP values of the solvents. We took the arithmetic mean (average) of each HSP components and used them as initial coordinates. To find the optimized position, a desirability function (DF) was employed to determine the goodness-of-fit for this radius and origin. Nelder-Mead algorithm available in the Optimization Toolbox of MATLAB was used for the optimization, with the objective function (OF) defined for the process. The optimization of the location and size of the sphere was iterated until the DF was maximized, or OF was minimized.

**Table S3.** Physical properties of various solvents tested in this study and the result of UN sol addition test

| Solvent                     | UN sol addition test<br>(Sol-solvent : S /<br>Non-solvent : N) | Solubility parameter( $MPa$ ) <sup><math>\frac{1}{2}</math></sup> [a] |            |            |            | note |
|-----------------------------|----------------------------------------------------------------|-----------------------------------------------------------------------|------------|------------|------------|------|
|                             |                                                                | $\delta_d$                                                            | $\delta_p$ | $\delta_h$ | $\delta_t$ |      |
| N,N-dimethylformamide(DMF)  | S                                                              | 17.4                                                                  | 13.7       | 11.3       | 24.8       |      |
| Dimethyl sulfoxide(DMSO)    | S                                                              | 18.4                                                                  | 16.4       | 10.2       | 26.68      |      |
| N-methyl-2-pyrrolidone(NMP) | S                                                              | 18                                                                    | 12.3       | 7.2        | 22.96      |      |
| N,N-dimethylacetamide(DMAc) | S                                                              | 16.8                                                                  | 11.5       | 10.2       | 22.77      |      |
| Tetrahydrofuran(THF)        | N                                                              | 16.8                                                                  | 5.7        | 8          | 18.43      |      |
| Acetone                     | N                                                              | 15.5                                                                  | 10.4       | 7          | 19.94      |      |
| Acetonitrile(MeCN)          | N                                                              | 15.3                                                                  | 18         | 6.1        | 24.4       |      |
| Chloroform(CF)              | N                                                              | 17.8                                                                  | 3.1        | 5.7        | 19.95      |      |
| Dichloromethane(DCM)        | N                                                              | 18.2                                                                  | 6.3        | 6.1        | 20.2       |      |
| Chlorobenzene(CB)           | N                                                              | 19                                                                    | 4.3        | 2          | 19.58      |      |
| Pyridine                    | N                                                              | 19                                                                    | 8.8        | 5.9        | 21.75      |      |
| Methanol(MeOH)              | N                                                              | 15.1                                                                  | 12.3       | 22.3       | 29.61      |      |

|                     |   |      |      |      |       |    |
|---------------------|---|------|------|------|-------|----|
| Ethanol(EtOH)       | N | 15.8 | 8.8  | 19.4 | 26.52 |    |
| Water               | N | 15.5 | 16   | 42.3 | 47.81 |    |
| n-hexane            | N | 14.9 | 0    | 0    | 14.9  |    |
| 1,2-dichloroethane  | N | 19.0 | 7.4  | 4.1  | 20.8  |    |
| Diethyl ether       | N | 14.5 | 2.9  | 5.1  | 15.65 |    |
| Propylene carbonate | N | 20.0 | 18.0 | 4.1  | 27.22 | 14 |
| Ethyl acetate       | N | 15.8 | 5.3  | 7.2  | 18.15 |    |

[a] : Solubility parameter values were obtained from ref. <sup>15-17</sup>.

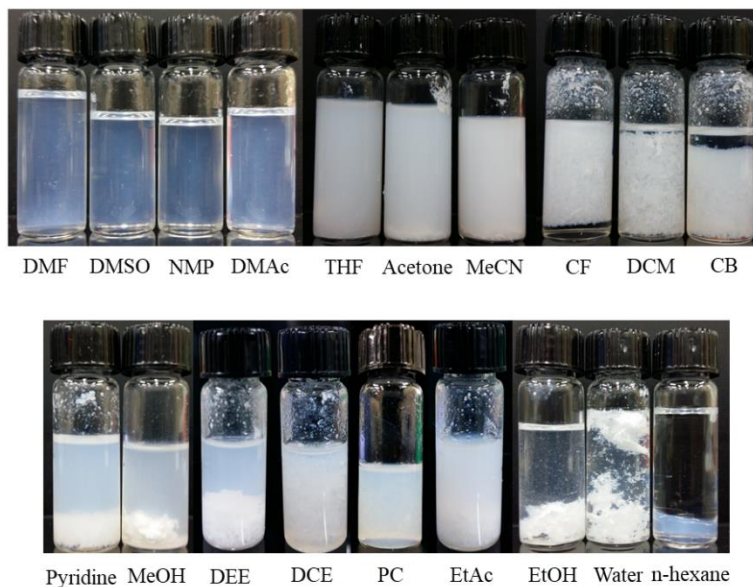

**Figure S13.** Optical image of the various solvents after UN sol (0.04g/ml,  $t_p = 60$  h) was added dropwise.

**Table S4.** Estimated Hansen solubility parameters of UN sol

|        | $\delta_d (MPa)^{\frac{1}{2}}$ | $\delta_p (MPa)^{\frac{1}{2}}$ | $\delta_h (MPa)^{\frac{1}{2}}$ | $\delta_t (MPa)^{\frac{1}{2}}$ |
|--------|--------------------------------|--------------------------------|--------------------------------|--------------------------------|
| UN sol | 18.4496                        | 13.4352                        | 8.5432                         | 24.37                          |

To graphically express the relative contribution of each HSP component to the total HSP, a set of fractional parameters ( $\Xi_d$ ,  $\Xi_p$ ,  $\Xi_h$ ) were derived from the HSP values of the solvents and polymers using the formulas<sup>18</sup>

$$\Xi_d = \delta_d / (\delta_d + \delta_p + \delta_h) \quad (2),$$

$$\Xi_p = \delta_p / (\delta_d + \delta_p + \delta_h) \quad (3),$$

$$\Xi_h = \delta_h / (\delta_d + \delta_p + \delta_h) \quad (4).$$

The fractional parameters were plotted on a triangular graph, also known as a Teas graph, with sol-solvents, non-solvents, and polymers marked in different colors (**Figure S12**).

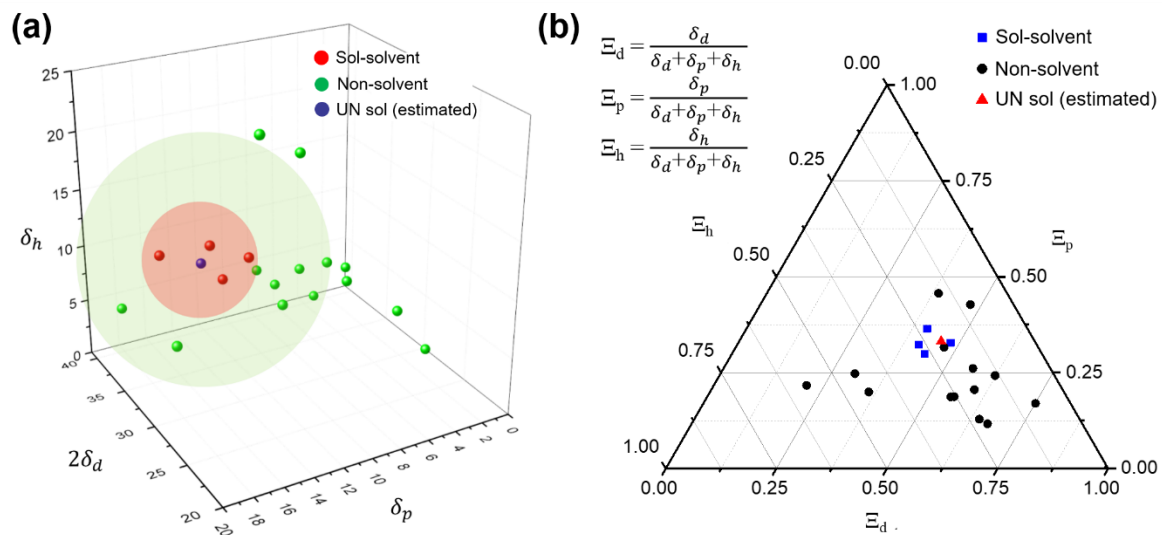

**Figure S14.** Hansen solubility parameter estimation of UN sol. (a) Solubility parameter space (b) Teas plot

## S7. Calculation of interaction parameters between polymers and UN sol

Interaction parameter between polymer and UN sol ( $\chi_{\text{polymer-UN}}$ ) was calculated using the following expression.(ref)

$$\chi_{\text{polymer-UN}} = (v_{\text{seg}}/kT)(\delta_{\text{polymer}} - \delta_{\text{UN}})^2$$

, where  $v_{\text{seg}}$  is a segmental volume,  $k$  is Boltzmann constant,  $T$  is absolute temperature (K), and  $\delta_{\text{polymer}}$  and  $\delta_{\text{UN}}$  are solubility parameters of polymer and UN sol, respectively. We used a molar volume of DMF (77 cm<sup>3</sup>/mol) for the segmental volume,  $k = 1.3806 \times 10^{-23}$  m<sup>2</sup> kg s<sup>-2</sup> K<sup>-1</sup> and  $T = 303\text{K}$  for the calculation.

**Table S5.** Estimated interaction parameters between polymers and UN sol

| species | solubility parameter<br>(MPa <sup>1/2</sup> ) | $\chi_{\text{polymer-UN}}$ |
|---------|-----------------------------------------------|----------------------------|
| UN sol  | 24.4                                          | -                          |
| DMF     | 24.8                                          | -                          |
| PEG     | 19.9                                          | 0.61                       |
| PMMA    | 21.1                                          | 0.33                       |
| PSF     | 22.9                                          | 0.066                      |
| PS      | 19.3                                          | 0.80                       |
| PVP     | 24.3                                          | 0.00015                    |

**Table S6.** Calculation of segregation strength between polymer and UN sol

| Polymer | $\chi_{\text{polymer-UN}}$ | average $M_w$<br>(g/mol) | $R_g$ (nm) <sup>[a][b]</sup> | $R_{g, \text{polymer}}/R_{h, \text{UN}}$ <sup>[c]</sup> | $\chi_{\text{polymer-UN}}(R_{g, \text{polymer}}/R_{h, \text{UN}})$ |
|---------|----------------------------|--------------------------|------------------------------|---------------------------------------------------------|--------------------------------------------------------------------|
| PEG     | 0.951                      | 31,100                   | 5.24                         | 0.887                                                   | 0.844                                                              |
|         |                            | 10,400                   | 2.52                         | 0.427                                                   | 0.406                                                              |
| PMMA    | 0.667                      | 14,800                   | 2.92                         | 0.492                                                   | 0.328                                                              |
|         |                            | 2,700                    | 1.14                         | 0.193                                                   | 0.129                                                              |
|         |                            | 54,500                   | 5.7                          | 0.966                                                   | 0.644                                                              |
| PSF     | 0.406                      | 40,700                   | 6                            | 1.02                                                    | 0.413                                                              |
| PS      | 1.14                       | 35,000                   | 5.2                          | 0.881                                                   | 1.003                                                              |
|         |                            | 5,400                    | 2.78                         | 0.471                                                   | 0.536                                                              |
| PVP     | 0.00015                    | 28,600                   | 5.58                         | 0.947                                                   | 0.000142                                                           |
|         |                            | 9,900                    | 3.1                          | 0.528                                                   | $7.91 \times 10^{-5}$                                              |

[a] Radius of gyration ( $R_g$ ) values of the polymers were estimated from the references using their molecular weights.

[b] For PVP,  $R_g$  values were obtained from the scaling relationship between  $R_g$  and hydrodynamic radius as used in the reference.<sup>19</sup>

[c] Hydrodynamic radius of UN sol was obtained from DLS measurement of UN sol solution (0.04 g/ml, polymerization time = 60 h)

### S8. Effect of polymerization time on the morphology of e-polymer/UN films

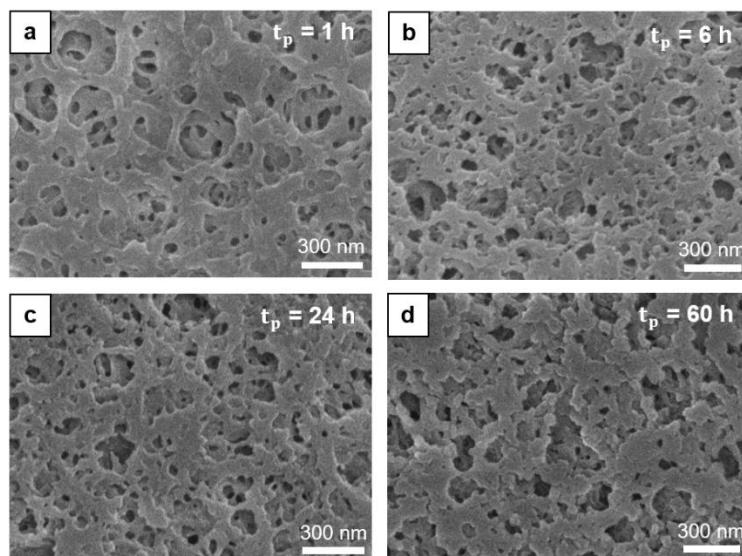

**Figure S15.** Top-surface SEM images of e-PMMA/UN (PMMA15000,  $W_p=0.5$ ) films with different polymerization times. (a)  $t_p=1$ h, (b)  $t_p=6$ h, (c)  $t_p=24$ h, and (d)  $t_p=60$ h.

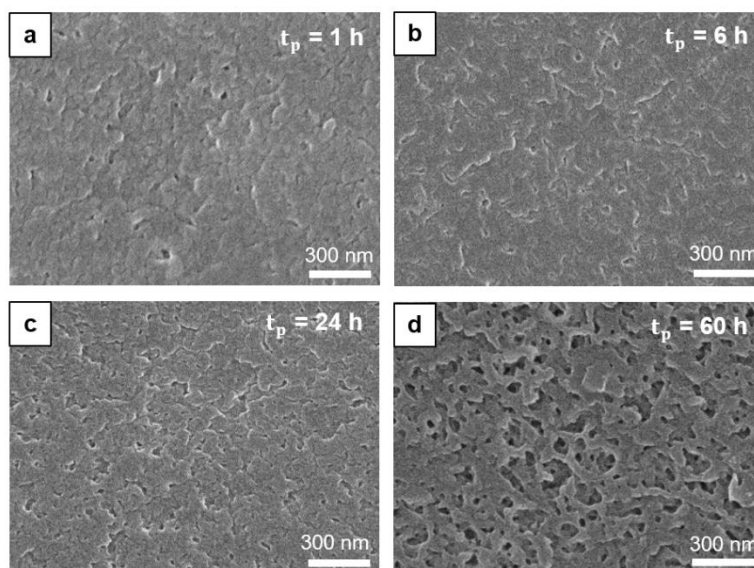

**Figure S16.** Top-surface SEM images of e-PEG/UN (PEG35000,  $W_p=0.6$ ) films with different polymerization times. (a)  $t_p=1$ h, (b)  $t_p=6$ h, (c)  $t_p=24$ h, and (d)  $t_p=60$ h.

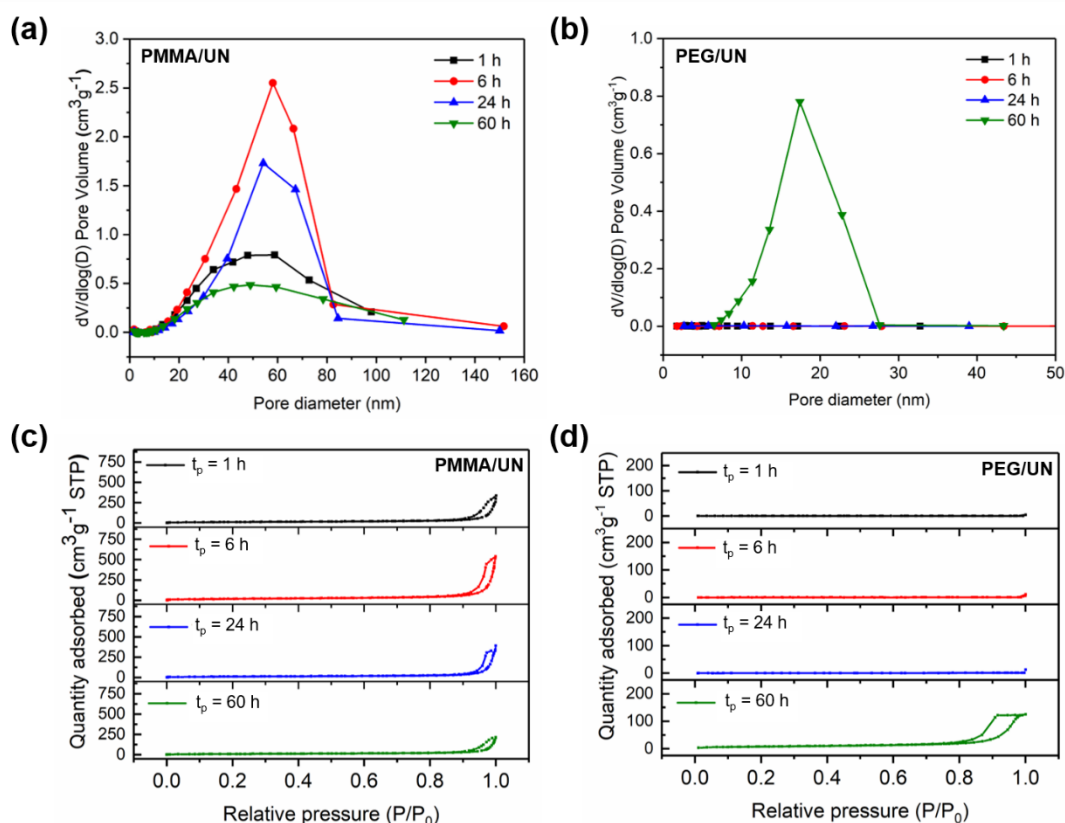

**Figure S17.** Porosity of e-PMMA/UN and e-PEG/UN films prepared with different polymerization time ( $t_p$ ). BJH pore size distribution curves of (a) e-PMMA/UN and (b) e-PEG/UN. Nitrogen sorption isotherms of (c) e-PMMA/UN and (d) e-PEG/UN.

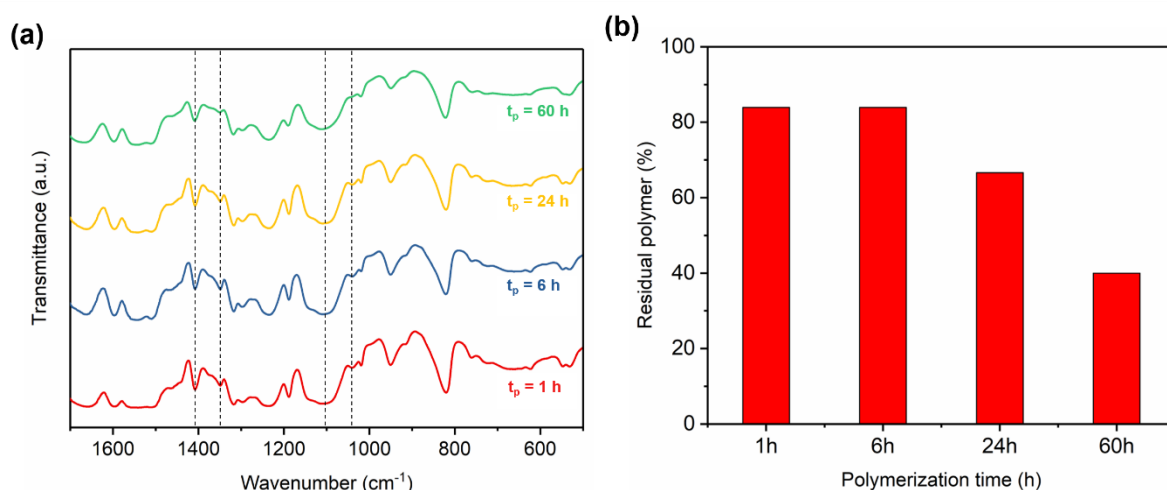

**Figure S18.** Effect of polymerization time of UN sol. (a) FTIR spectrum of e-PEG/UN prepared from PEG/UN blend (PEG35000,  $W_p=0.5$ ) with different polymerization time ( $t_p$ ) of 1, 6, 24, and 60 h. Characteristic peaks of PEG used for the calculation of the remaining PEG in e-PEG/UN are denoted by the dotted lines. (b) The residual amount of PEG relative to the initial amount after solvent extraction of the PEG/UN blends prepared with various polymerization time.

**Table S7.** Porous characteristics of solvent-extracted PMMA/UN and PEG/UN films (e-PMMA/UN and PEG/UN) prepared with different polymerization time ( $t_p$ )

| e-polymer/UN               | Polymerization time ( $t_p$ , hour) | Porosity                                        |                                              |                             |
|----------------------------|-------------------------------------|-------------------------------------------------|----------------------------------------------|-----------------------------|
|                            |                                     | BET surface area ( $\text{m}^2 \text{g}^{-1}$ ) | Pore volume* ( $\text{cm}^3 \text{g}^{-1}$ ) | Average pore diameter* (nm) |
| e-PMMA/UN<br>( $W_p=0.5$ ) | 1                                   | 44.7                                            | 0.44                                         | 35.6                        |
|                            | 6                                   | 66.3                                            | 0.83                                         | 41.5                        |
|                            | 24                                  | 39.8                                            | 0.52                                         | 44.0                        |
|                            | 60                                  | 36.1                                            | 0.31                                         | 34.6                        |
| e-PEG/UN<br>( $W_p=0.5$ )  | 1                                   | 0.621                                           | 0.000584                                     | 5.70                        |
|                            | 6                                   | 0.500                                           | 0.000761                                     | 9.43                        |
|                            | 24                                  | 1.28                                            | 0.00154                                      | 7.74                        |
|                            | 60                                  | 28.8                                            | 0.189                                        | 15.7                        |

\* Pore volume and average pore diameter were calculated by BJH method from the desorption branch of the nitrogen sorption isotherm.

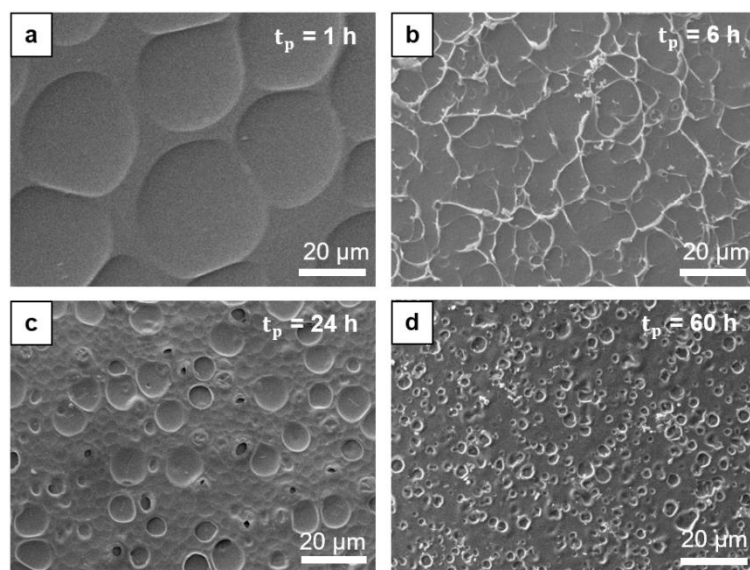

**Figure S19.** Top-surface SEM images of e-PS/UN (PS35000,  $W_p=0.5$ ) films with different polymerization times. (a)  $t_p=1\text{h}$ , (b)  $t_p=6\text{h}$ , (c)  $t_p=24\text{h}$ , and (d)  $t_p=60\text{h}$ .

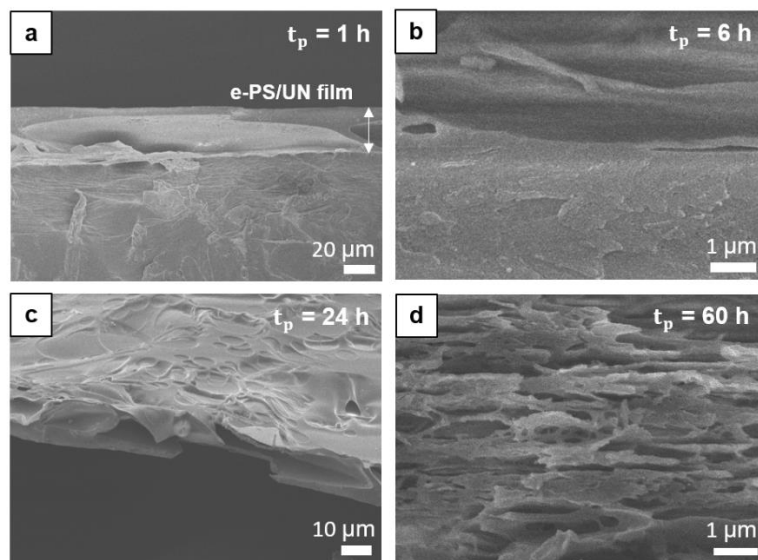

**Figure S20.** Cross-sectional SEM images of e-PS/UN (PS35000,  $W_p=0.5$ ) films with different polymerization times. (a)  $t_p=1\text{h}$ , (b)  $t_p=6\text{h}$ , (c)  $t_p=24\text{h}$ , and (d)  $t_p=60\text{h}$ .

## S9. Effect of solvent evaporation temperature on the morphology of e-PMMA/UN films

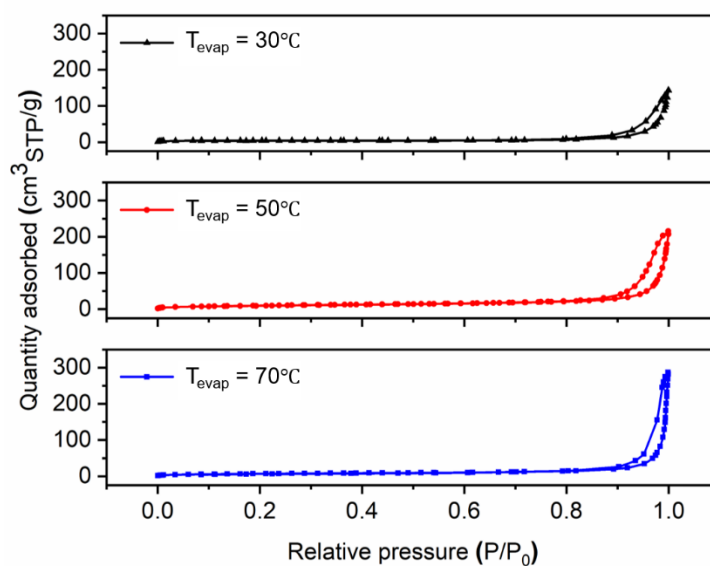

**Figure S21.** Nitrogen sorption isotherms of e-PMMA/UN films prepared with different solvent evaporation temperature ( $T_{\text{evap}}$ ).

**Table S8.** Porous characteristics of solvent-extracted PMMA/UN and PEG/UN films prepared with different solvent evaporation temperature ( $T_{\text{evap}}$ )

| Polymer/UN               | Solvent evaporation temperature ( $T_{\text{evap}}$ , °C) | Porosity                                        |                                              |                             |
|--------------------------|-----------------------------------------------------------|-------------------------------------------------|----------------------------------------------|-----------------------------|
|                          |                                                           | BET surface area ( $\text{m}^2 \text{g}^{-1}$ ) | Pore volume* ( $\text{cm}^3 \text{g}^{-1}$ ) | Average pore diameter* (nm) |
| PMMA/UN<br>( $W_p=0.5$ ) | 30                                                        | 14.6                                            | 0.20                                         | 36.0                        |
|                          | 50                                                        | 36.1                                            | 0.33                                         | 36.6                        |
|                          | 70                                                        | 24.4                                            | 0.43                                         | 53.3                        |

\* Pore volume and average pore diameter were calculated by BJH method from the desorption branch of the nitrogen sorption isotherm.

## S10. Supplementary references

- (1) Ganesan, P.; Yang, X.; Loos, J.; Savenije, T. J.; Abellon, R. D.; Zuilhof, H.; Sudhölter, E. J. R. Tetrahedral N-Type Materials: Efficient Quenching of the Excitation of p-Type Polymers in Amorphous Films. *J. Am. Chem. Soc.* **2005**, *127* (42), 14530–14531. <https://doi.org/10.1021/ja053689m>.
- (2) Gharagheizi, F. New Procedure to Calculate the Hansen Solubility Parameters of Polymers. *J. Appl. Polym. Sci.* **2007**, *103* (1), 31–36. <https://doi.org/10.1002/app.23874>.
- (3) Deng, B.; Yang, X.; Xie, L.; Li, J.; Hou, Z.; Yao, S.; Liang, G.; Sheng, K.; Huang, Q. Microfiltration Membranes with PH Dependent Property Prepared from Poly(Methacrylic Acid) Grafted Polyethersulfone Powder. *J. Membr. Sci.* **2009**, *330* (1), 363–368. <https://doi.org/10.1016/j.memsci.2009.01.010>.
- (4) Snively, D. L.; Dubsky, J. Near-IR Spectra of Polyethylene, Polyethylene Glycol, and Polyvinylethyl Ether. *J. Polym. Sci. Part Polym. Chem.* **1996**, *34* (13), 2575–2579. [https://doi.org/10.1002/\(SICI\)1099-0518\(19960930\)34:13<2575::AID-POLA3>3.0.CO;2-R](https://doi.org/10.1002/(SICI)1099-0518(19960930)34:13<2575::AID-POLA3>3.0.CO;2-R).
- (5) Rozenberg, M.; Loewenschuss, A.; Marcus, Y. IR Spectra and Hydration of Short-Chain Polyethyleneglycols. *Spectrochim. Acta. A. Mol. Biomol. Spectrosc.* **1998**, *54* (12), 1819–1826. [https://doi.org/10.1016/S1386-1425\(98\)00062-6](https://doi.org/10.1016/S1386-1425(98)00062-6).
- (6) Bi, H.; Meng, S.; Li, Y.; Guo, K.; Chen, Y.; Kong, J.; Yang, P.; Zhong, W.; Liu, B. Deposition of PEG onto PMMA Microchannel Surface to Minimize Nonspecific Adsorption. *Lab. Chip* **2006**, *6* (6), 769–775. <https://doi.org/10.1039/B600326E>.
- (7) Liu, Y.; Hu, W.; Lu, Z.; Li, C. M. Photografted Poly(Methyl Methacrylate)-Based High Performance Protein Microarray for Hepatitis B Virus Biomarker Detection in Human Serum. *MedChemComm* **2010**, *1* (2), 132–135. <https://doi.org/10.1039/C0MD00032A>.
- (8) Pelfrey, S.; Cantu, T.; Papantonakis, M. R.; Simonson, D. L.; McGill, R. A.; Macosay, J. Microscopic and Spectroscopic Studies of Thermally Enhanced Electrospun PMMA Micro- and Nanofibers. *Polym. Chem.* **2010**, *1* (6), 866–869. <https://doi.org/10.1039/C0PY00012D>.
- (9) Bae, J.-S.; Jeon, E.; Byeon, M.; Park, J.-W. Spontaneous Formation of a Continuous Nanoporous Structure in the Composite Films of a Covalent Molecular Network and Polymer. *Macromol. Res.* **2016**, *24* (3), 205–208. <https://doi.org/10.1007/s13233-016-4005-9>.
- (10) Kawaguchi, S.; Imai, G.; Suzuki, J.; Miyahara, A.; Kitano, T.; Ito, K. Aqueous Solution Properties of Oligo- and Poly(Ethylene Oxide) by Static Light Scattering and Intrinsic Viscosity. *Polymer* **1997**, *38* (12), 2885–2891. [https://doi.org/10.1016/S0032-3861\(96\)00859-2](https://doi.org/10.1016/S0032-3861(96)00859-2).
- (11) Gupta, P.; Elkins, C.; Long, T. E.; Wilkes, G. L. Electrospinning of Linear Homopolymers of Poly(Methyl Methacrylate): Exploring Relationships between Fiber Formation, Viscosity, Molecular Weight and Concentration in a Good Solvent. *Polymer* **2005**, *46* (13), 4799–4810. <https://doi.org/10.1016/j.polymer.2005.04.021>.
- (12) Ioan, S.; Filimon, A.; Avram, E. Influence of the Degree of Substitution on the Solution Properties of Chloromethylated Polysulfone. *J. Appl. Polym. Sci.* **2006**, *101* (1), 524–531. <https://doi.org/10.1002/app.23340>.
- (13) Zhou, J.; van Duijneveldt, J. S.; Vincent, B. The Phase Behavior of Dispersions of Silica Particles in Mixtures of Polystyrene and Dimethylformamide. *Langmuir* **2010**, *26* (12), 9397–9402. <https://doi.org/10.1021/la1003963>.
- (14) Jessop, P. G.; Jessop, D. A.; Fu, D.; Phan, L. Solvatochromic Parameters for Solvents of Interest in Green Chemistry. *Green Chem.* **2012**, *14* (5), 1245–1259.

<https://doi.org/10.1039/C2GC16670D>.

- (15) Hansen, C. M.; Smith, A. L. Using Hansen Solubility Parameters to Correlate Solubility of C60 Fullerene in Organic Solvents and in Polymers. *Carbon* **2004**, 42 (8), 1591–1597. <https://doi.org/10.1016/j.carbon.2004.02.011>.
- (16) Duereh, A.; Sato, Y.; Smith, R. L.; Inomata, H. Replacement of Hazardous Chemicals Used in Engineering Plastics with Safe and Renewable Hydrogen-Bond Donor and Acceptor Solvent-Pair Mixtures. *ACS Sustain. Chem. Eng.* **2015**, 3 (8), 1881–1889. <https://doi.org/10.1021/acssuschemeng.5b00474>.
- (17) Hansen, C. M. *Hansen Solubility Parameters: A User's Handbook, Second Edition - CRC Press Book*, 2nd edition.; CRC Press, 2007.
- (18) Miller-Chou, B. A.; Koenig, J. L. A Review of Polymer Dissolution. *Prog. Polym. Sci.* **2003**, 28 (8), 1223–1270. [https://doi.org/10.1016/S0079-6700\(03\)00045-5](https://doi.org/10.1016/S0079-6700(03)00045-5).
- (19) Kok, C. M.; Rudin, A. Relationship between the Hydrodynamic Radius and the Radius of Gyration of a Polymer in Solution. *Makromol. Chem. Rapid Commun.* **1981**, 2 (11), 655–659. <https://doi.org/10.1002/marc.1981.030021102>.
